# Supplementary material
Source: publisher site journal article supplement (https://www.spandidos-publications.com/8131/downloadSupplementary)

Figure S1. Effect of RMI1 expression levels on DFI (A) and RFS (B). RMI1, RecQ mediated genome instability 1; DFI, disease-free interval; RFS, relapse-free survival.

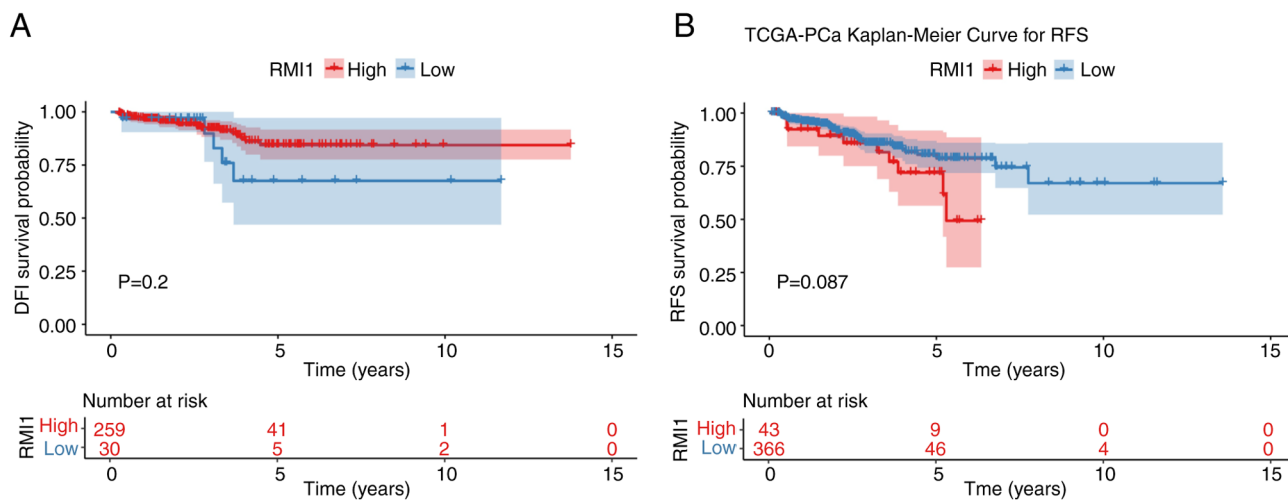

Supplement: Supplementary file 1 [file downloadSupplementary]
